# Supplementary material for: Effects of Ultra-Short Pulsed Electric Field Exposure on Glioblastoma Cells
Source: MDPI journal article supplement (doi:10.3390/ijms23063001), 2022-03-10
Supplement: s1 [file s1]

**Supplementary Table S1.** List of primers used for quantitative real time PCR.

| Human Gene       | Forward primer                        | Reverse primer                     |
|------------------|---------------------------------------|------------------------------------|
| <i>Cd133</i>     | 5'- TCCACAGAAATTTACCTACATTGG -3'      | 5'- CAGCAGAGAGCAGATGACCA -3'       |
| <i>CD15</i>      | 5'-TGGGCAGGCTGGTCTTGAAC-3'            | 5'- CACGGCGGCTCACACCTGTA-3'        |
| <i>β III TUB</i> | 5'- AGATGTACGAAGACGACGAGGAG-3'        | 5'- GTATCCCCGAAAATATAAACACAAA-3'   |
| <i>P53</i>       | 5'- TAACAGTTCCTGCATGGGCGGC-3'         | 5'-AGGACAGGCACAAACACGCACC-3'       |
| <i>P21</i>       | 5'- TCC AGC GAC CTT CCT CAT CCA C -3' | 5' -TCCATAGCC TCTACTGCC ACC ATC-3' |
| <i>Cyclin D1</i> | 5' TGTGCATCTACACCGACAAC-3'            | 5'- CACAGAGGGCAACGAAGGT-3'         |
| <i>GADD45a</i>   | 5' TCGTGAAATGGAAGGGATGG -3'           | 5'-AGGTTTTGGGCTTGGGTC-3'           |
| <i>CDK2</i>      | 5'-CGGAGCTTGTATCGCAAAT -3'            | 5' -CACTGGAGGAGAGGGTGAGA -3'       |
| <i>CDK4</i>      | 5'-CACAGCTGCTGCTGGAAAT-3'             | 5'-TGCTCACTCCGGATTACCTT-3'         |
| <i>IL6</i>       | 5 '-CAAGTCGGAGGCTTAATTACACATG -3 '    | 5 '- AGAAAAGAGTTGTGCAATGGCA -3 '   |
| <i>CCL20</i>     | 5'- AAGTTGTCTGTGTGCGCAAATCC-3'        | 5'- CCATTCCAGAAAAGCCACAGTTTT -3'   |
| <i>iNOS</i>      | 5'AGTATCACAGGCTTCCATTGACC-3'          | 5'-GAAGCCGCTGGCATTCCGCA-3'         |
| <i>COX2</i>      | 5'- CGGTGAAACTCTGGCTAGACAG-3'         | 5'- GCAAACCGTAGATGCTCAGGGA -3'     |
| <i>β CATENIN</i> | 5'-GGTGGACCCCAAGCTTTAG-3'             | 5'- AGTGGGATGCTGGGTGTAA-3'         |
| <i>SOX 2</i>     | 5'- GAGCTTTGCAGGAAGTTTGC -3'          | 5'- GCAAGAAGCCTCTCCTTGAA -3'       |
| <i>NANOG</i>     | 5'- ACCTGGCTGCCGTCTCTGG -3'           | 5'- AGCAAAGCCTCCCAATCCCAAACA -3'   |
| <i>OCT4</i>      | 5'- TTTTGGTACCCAGGCTATG -3'           | 5'- TTTTGGTACCCAGGCTATG -3'        |
| <i>COX2</i>      | 5'- CGGTGAAACTCTGGCTAGACAG-3'         | 5'- GCAAACCGTAGATGCTCAGGGA -3'     |
| <i>GADPH</i>     | 5'- ATTCCACCCATGGCAAATTC -3'          | 5'- GGGATTTCATTGATGACAAG -3'       |
